# Supplementary material for: Remote monitoring in patients with heart failure with cardiac implantable electronic devices: a systematic review and meta-analysis
Source: HighWire-hosted journal article supplement (doi:10.1136/openhrt-2022-002096), 2022-11-01
Supplement: openhrt-2022-002096supp002_data_supplement.pdf [file openhrt-2022-002096supp002_data_supplement.pdf]

## PRISMA 2020 flow diagram for new systematic reviews which included searches of databases, registers and other sources

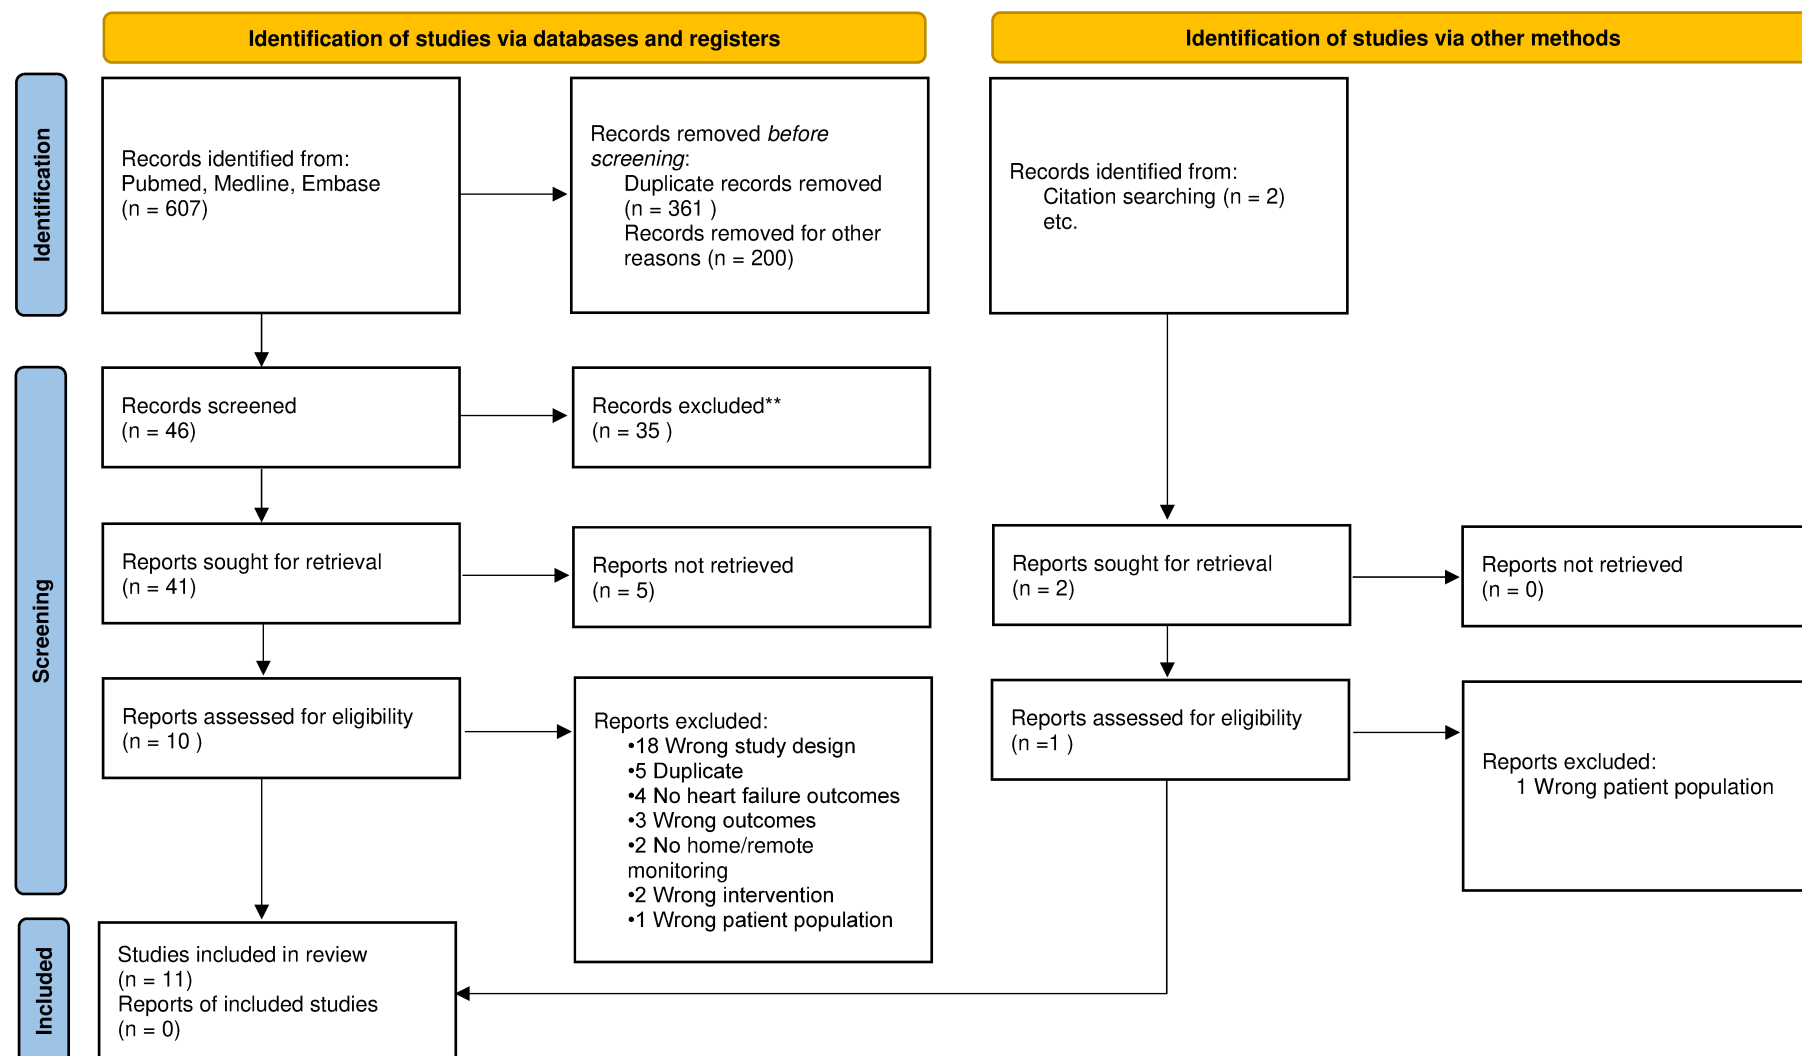

\*Consider, if feasible to do so, reporting the number of records identified from each database or register searched (rather than the total number across all databases/registers).

\*\*If automation tools were used, indicate how many records were excluded by a human and how many were excluded by automation tools.

From: Page MJ, McKenzie JE, Bossuyt PM, Boutron I, Hoffmann TC, Mulrow CD, et al. The PRISMA 2020 statement: an updated guideline for reporting systematic reviews. BMJ 2021;372:n71. doi: 10.1136/bmj.n71. For more information, visit: <http://www.prisma-statement.org/>
